# Supplementary material for: In situ self-assembly of molybdenum carbide and iron carbide heterostructures on N-doped carbon for an efficient oxygen reduction reaction
Source: Royal Society of Chemistry journal article supplement (doi:10.1039/d4nr00799a), 2024-01-01
Supplement: d4nr00799a1.pdf [file d4nr00799a1.pdf]

## Supporting Information

### ***In-situ* self-assembly of molybdenum carbide and iron carbides heterostructure on N-doped carbon for efficient oxygen reduction reaction**

Sagar Ingavale<sup>1</sup>, Mohan Gopalakrishnan<sup>1</sup>, Phiralang Marbaniang<sup>2</sup>, Woranunt Lao-atiman<sup>1</sup>,  
Ahmad Azmin Mohamad<sup>3</sup>, Mai Thanh Nguyen<sup>4</sup>, Tetsu Yonezawa<sup>4</sup>, Anita Swami<sup>5\*</sup>,  
Soorathep Kheawhom<sup>1,6,7\*</sup>

<sup>1</sup> Department of Chemical Engineering, Faculty of Engineering, Chulalongkorn University,  
Bangkok 10330, Thailand

<sup>2</sup> Electrochemical Materials Lab, Faculty of Science (Chemistry), Ontario Tech University,  
Oshawa, ON L1G0C5, Canada

<sup>3</sup> Energy Materials Research Group (EMRG), School of Materials and Mineral Resources  
Engineering, Universiti Sains Malaysia, 14300, Nibong Tebal, Pulau Pinang, Malaysia

<sup>4</sup> Division of Materials Science and Engineering, Faculty of Engineering, Hokkaido  
University, Hokkaido 060-8628, Japan

<sup>5</sup> Department of Chemistry, SRM Institute of Science & Technology, Kattankulathur,  
Chennai 603203, India

<sup>6</sup> Center of Excellence on Advanced Materials for Energy Storage, Chulalongkorn University,  
Bangkok 10330, Thailand

<sup>7</sup> Bio-Circular-Green-economy Technology & Engineering Center (BCGeTEC), Faculty of  
Engineering, Chulalongkorn University, Bangkok 10330, Thailand

\*Corresponding author Email: [swamians@srmist.edu.in](mailto:swamians@srmist.edu.in) (Anita Swami),  
[soorathep.k@chula.ac.th](mailto:soorathep.k@chula.ac.th) (Soorathep Kheawhom)

## Characterization

The structural details of synthesized composites were evaluated using X-ray powder diffraction (XRD) measurements on X'pert pro diffractometer, PANalytical using  $\text{CuK}_\alpha$  line ( $\lambda = 1.5406 \text{ \AA}$ , 40 kV, 40 mA) in the  $2\theta$  range of  $10^\circ - 80^\circ$  with scan rate  $2^\circ/\text{min}$ . Raman spectroscopy (HORIBA, LABRAM HR Evolution) was studied using 633 nm laser excitation for the prepared composites. X-ray photoelectron spectroscopy (XPS) measurements were carried out using Shimadzu ESCA 3400 instrument with  $\text{AlK}_\alpha$  source (Physical Electronics system; 1486.6 eV monochromatic beam) operated at 15 kV, and the XPSPEAK41 software was used for curve fitting and data analysis. A linear-type background was used for data processing. Further, a detailed SEM study was carried out using 'Quanta 200 FEG FE-SEM'. Transmission electron microscopy (TEM) images were taken on a JEOL Japan, JEM-2100 Plus microscope operated at 100 kV.

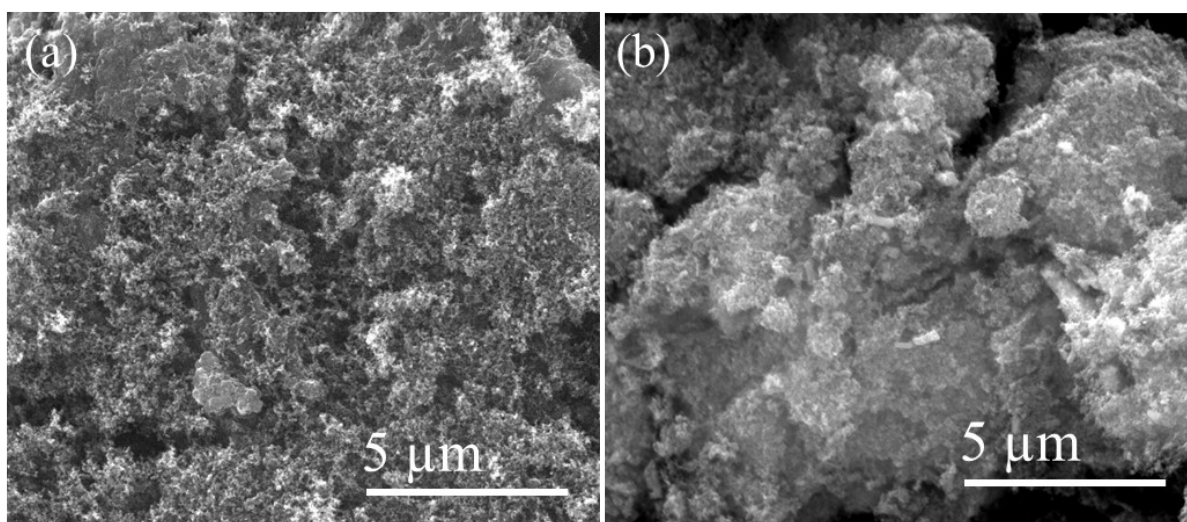

**Figure S1.** SEM images: (a) KBC, and (b) the  $\text{Mo}_2\text{C}/\text{Fe}_3\text{C}\text{-NC3}$  catalyst.

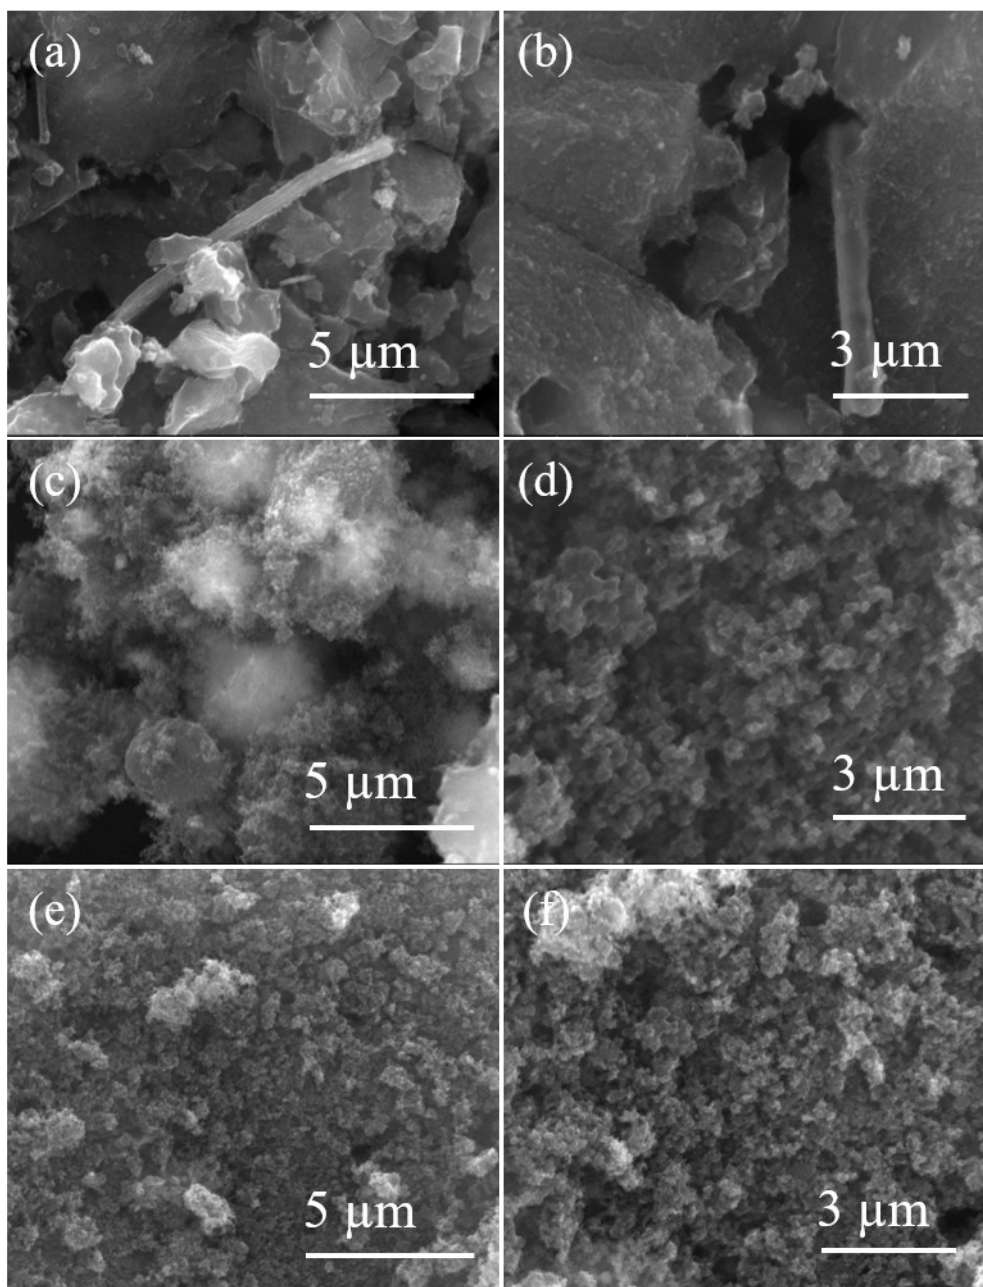

**Figure S2.** SEM images: (a, b)  $\text{Mo}_2\text{C}/\text{Fe}_3\text{C}$  catalyst, (c, d)  $\text{MoO}_2\text{-C}$ , and (e, f)  $\text{Fe}_2\text{O}_3\text{-C}$  composites.

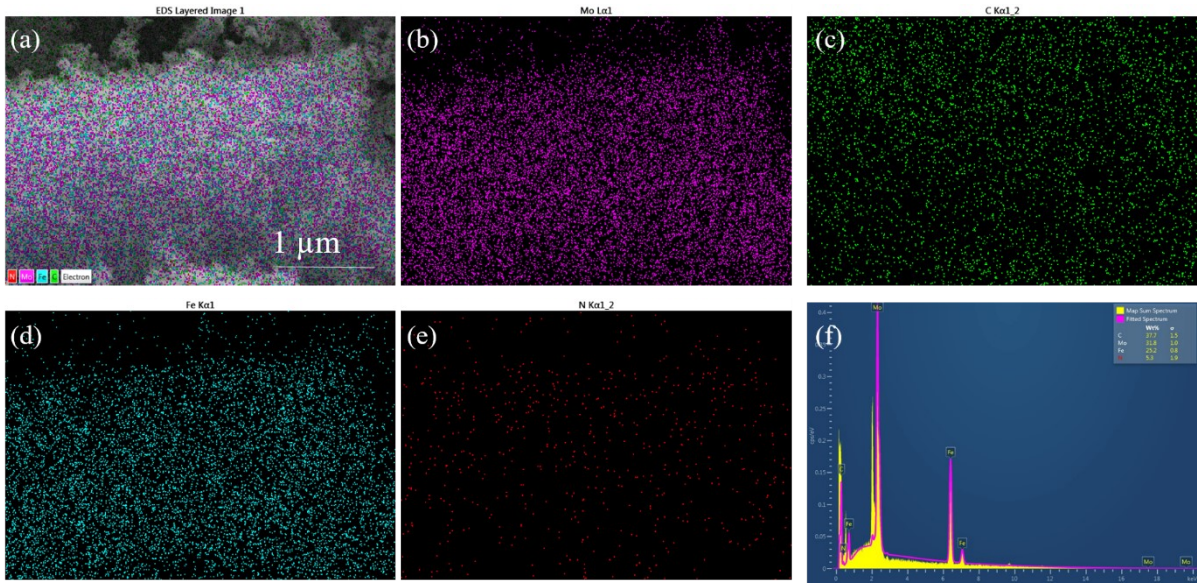

**Figure S3.** HR-SEM element mapping corresponds to (a) EDS layered image, (b) Mo, (c) C, (d) Fe, (e) N, and (f) EDS of  $\text{Mo}_2\text{C}/\text{Fe}_3\text{C-NC}_3$  composite.

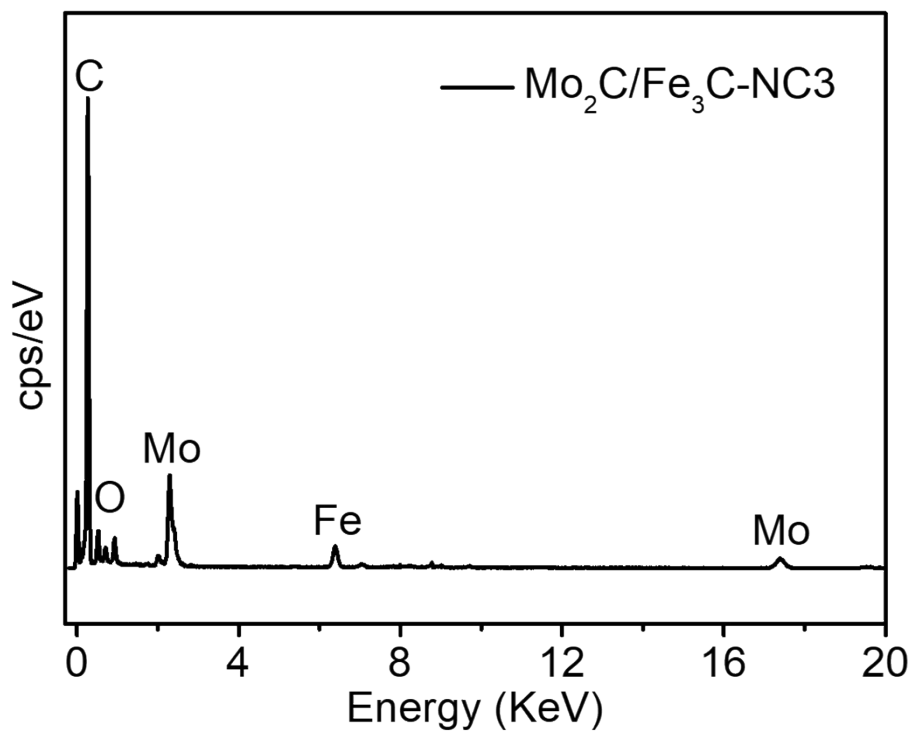

**Figure S4.** HR-TEM EDS spectrum of the prepared Mo<sub>2</sub>C/Fe<sub>3</sub>C-NC3 composite.

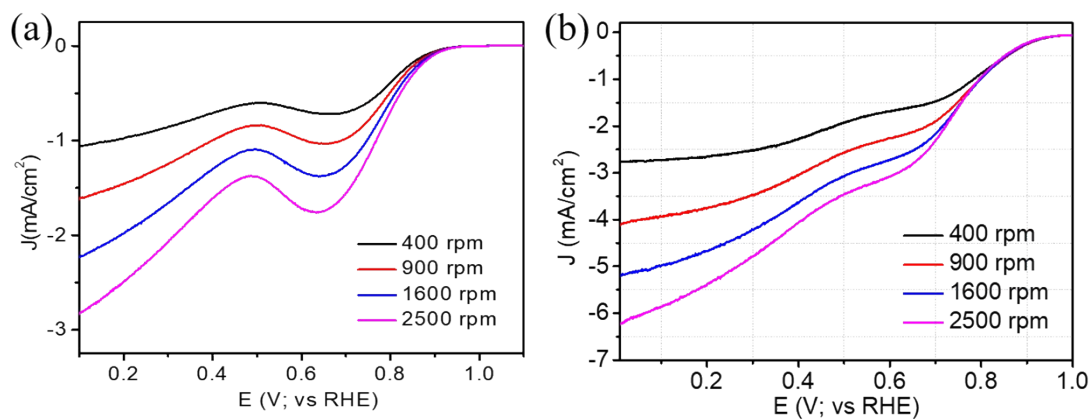

**Figure S5.** Polarization curves at different rotation: (a) KBC, and (b) Mo<sub>2</sub>C/Fe<sub>3</sub>C catalysts at scan rate 10 mV s<sup>-1</sup>, in O<sub>2</sub> saturated 0.1 M KOH.

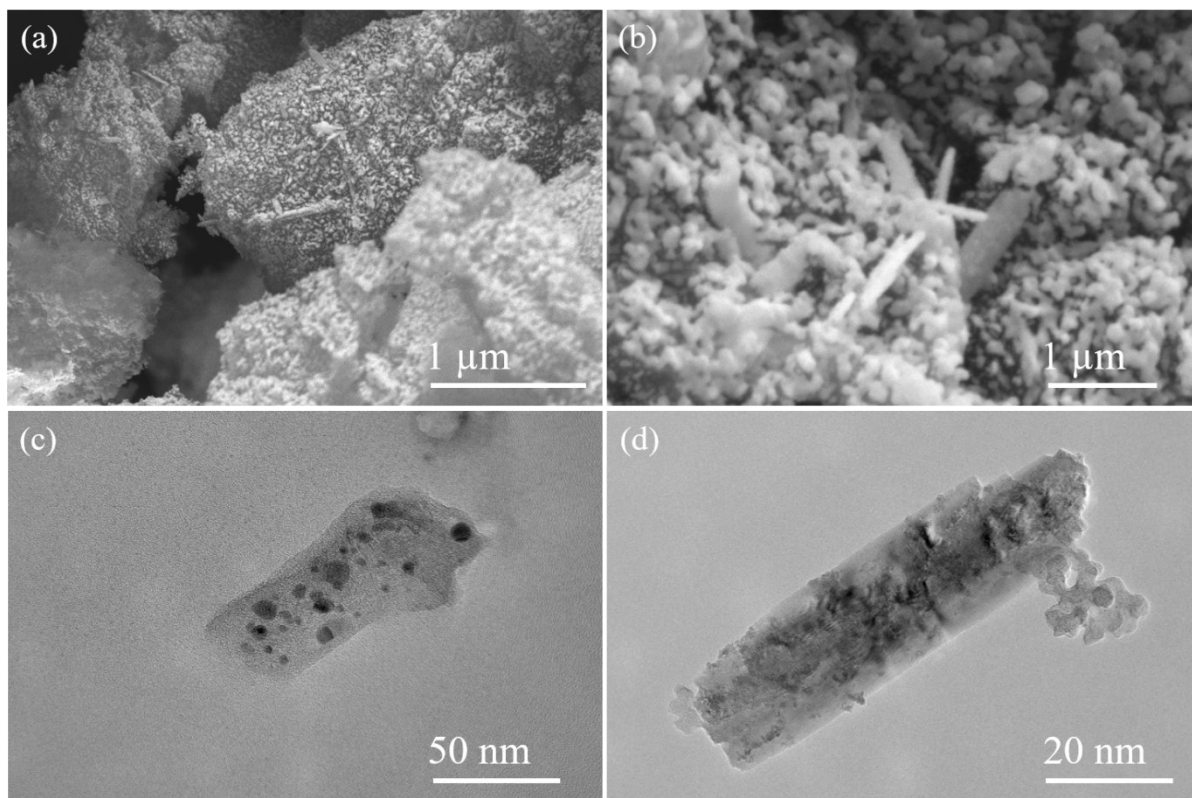

**Figure S6.** (a-b) SEM picture, and (c-d) low resolution TEM pictures for the  $\text{Mo}_2\text{C}/\text{Fe}_3\text{C-NC3}$  composite after stability analysis.

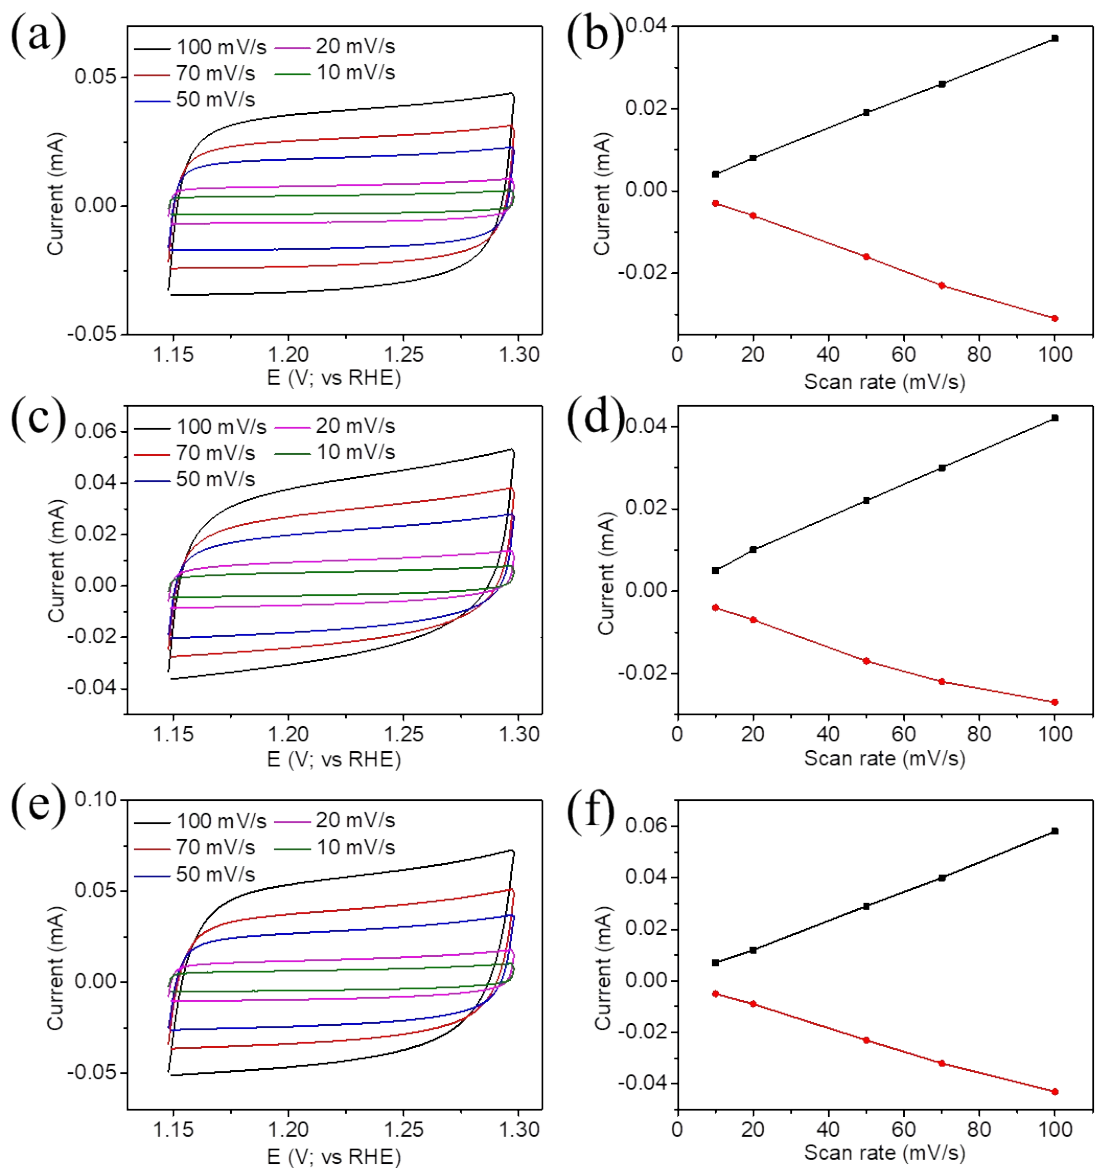

**Figure S7.** Comparative CVs and ECSA values: (a, b) MoO<sub>2</sub>-C, (c, d) Fe<sub>2</sub>O<sub>3</sub>-C, and (e, f) Mo<sub>2</sub>C/Fe<sub>3</sub>C-NC<sub>3</sub> catalysts.



**Table S1. XPS analysis.**

| No. | Name of the element | Core binding energy (eV) | FWHM (eV) |
|-----|---------------------|--------------------------|-----------|
| 1.  | C 1s                | 283.7                    | 0.9       |
|     |                     | 284.5                    | 0.9       |
|     |                     | 285.1                    | 1.6       |
|     |                     | 286.8                    | 2.0       |
| 2.  | O 1s                | 530.5                    | 1.6       |
|     |                     | 532.0                    | 2.3       |
|     |                     | 533.7                    | 1.7       |
| 3.  | Mo 3d               | 228.6                    | 1.0       |
|     |                     | 231.9                    | 1.3       |
|     |                     | 232.6                    | 1.3       |
|     |                     | 235.7                    | 1.3       |
| 4.  | N 1s                | 398.4                    | 1.6       |
|     |                     | 399.1                    | 1.9       |
|     |                     | 400.7                    | 2.1       |
| 5.  | Fe 2p               | 707.5                    | 1.8       |
|     |                     | 710.5                    | 2.6       |
|     |                     | 721                      | 2.9       |
|     |                     | 725.4                    | 1.26      |

**Table S2. Comparison of catalytic activity for the prepared catalysts.**

| No.       | Catalyst                                   | $E_{\text{onset}}$ (V) | $E_{1/2}$ (V) | $J_L$<br>(mA/cm <sup>2</sup> ) | Mass activity<br>(mA/mg) |
|-----------|--------------------------------------------|------------------------|---------------|--------------------------------|--------------------------|
| 1.        | MoO <sub>2</sub> -C                        | 0.89                   | 0.76          | 4.2                            | 38                       |
| 2.        | Fe <sub>2</sub> O <sub>3</sub> -C          | 0.95                   | 0.8           | 5.6                            | 83                       |
| 3.        | Mo <sub>2</sub> C/Fe <sub>3</sub> C-NC1    | 1.00                   | 0.84          | 6.0                            | 69                       |
| 4.        | Mo <sub>2</sub> C/Fe <sub>3</sub> C-NC2    | 0.97                   | 0.86          | 5.9                            | 139                      |
| <b>5.</b> | <b>Mo<sub>2</sub>C/Fe<sub>3</sub>C-NC3</b> | <b>1.00</b>            | <b>0.89</b>   | <b>6.2</b>                     | <b>221</b>               |
| 6.        | Mo <sub>2</sub> C/Fe <sub>3</sub> C-NC4    | 1.00                   | 0.88          | 5.5                            | 190                      |

**Table S3. Comparison of ORR catalytic performances of Mo<sub>2</sub>C/Fe<sub>3</sub>C-NC3 with those of other reported electro-catalysts in alkaline media**

| No. | Catalyst                                | E <sub>onset</sub> (V) | E <sub>1/2</sub> (V) | J <sub>L</sub> (mA/cm <sup>2</sup> ) | Reference |
|-----|-----------------------------------------|------------------------|----------------------|--------------------------------------|-----------|
| 1   | Mo <sub>2</sub> C/Fe <sub>3</sub> C-NC3 | 1.00                   | 0.89                 | 6.2                                  | This work |
| 2   | Mo <sub>2</sub> C@NC/Co@NG-900          | 0.922                  | 0.867                | 5.5                                  | 1         |
| 3   | Mo <sub>2</sub> C-GNR                   | 0.93                   | 0.8                  | 4.6                                  | 2         |
| 4   | Mo <sub>2</sub> C/NCNT-30               | 0.85                   | 0.62                 | 4.22                                 | 3         |
| 5   | MoC/NGr-3                               | 0.93                   | 0.80                 | 3.091                                | 4         |
| 6   | Mo <sub>2</sub> C/CXG                   | 0.89                   | 0.71                 | 4.1                                  | 5         |
| 7   | Mo <sub>2</sub> C/NPCNFs                | 0.9                    | 0.77                 | 4.8                                  | 6         |
| 8   | Fe-PANI@NP                              | 0.85                   | 0.72                 | 4.5                                  | 7         |
| 9   | Fe <sub>3</sub> C/N,S-CNS               | 0.98                   | 0.86                 | 5.8                                  | 8         |
| 10  | Fe-SAs/Fe <sub>3</sub> C-Fe@NC          | 0.98                   | 0.925                | 5.6                                  | 9         |
| 11  | Fe <sub>3</sub> C@N-CNTs                | 0.98                   | 0.85                 | 5.0                                  | 10        |
| 12  | Fe <sub>3</sub> C-Co-NC                 | 1.02                   | 0.89                 | 4.5                                  | 11        |

## References

1. Y. Wang, K. Li, F. Yan, C. Li, C. Zhu, X. Zhang and Y. Chen, *Nanoscale*, 2019, **11**, 12563-12572, 10.1039/C9NR02981H.
2. X. Fan, Y. Liu, Z. Peng, Z. Zhang, H. Zhou, X. Zhang, B. I. Yakobson, W. A. Goddard, III, X. Guo, R. H. Hauge and J. M. Tour, *ACS Nano*, 2017, **11**, 384-394, 10.1021/acsnano.6b06089.
3. Y.-J. Song, J.-T. Ren, G. Yuan, Y. Yao, X. Liu and Z.-Y. Yuan, *Journal of Energy Chemistry*, 2019, **38**, 68-77, 10.1016/j.jechem.2019.01.002.
4. H. Huang, C. Du, S. Wu and W. Song, *The Journal of Physical Chemistry C*, 2016, **120**, 15707-15713, 10.1021/acs.jpcc.5b10341.
5. D. Mladenović, M. Vujković, S. Mentus, D. M. F. Santos, R. P. Rocha, C. A. C. Sequeira, J. L. Figueiredo and B. Šljukić, *Nanomaterials*, 2020, **10**, 1805, 10.3390/nano10091805.

6. H. Wang, C. Sun, Y. Cao, J. Zhu, Y. Chen, J. Guo, J. Zhao, Y. Sun and G. Zou, *Carbon*, 2017, **114**, 628-634, 10.1016/j.carbon.2016.12.081.
7. R. Venegas, C. Zúñiga, J. H. Zagal, A. Toro-Labbé, J. F. Marco, N. Menéndez, K. Muñoz-Becerra and F. J. Recio, *ChemElectroChem*, 2022, **9**, e202200115, 10.1002/celec.202200115.
8. Q.-D. Ruan, R. Feng, J.-J. Feng, Y.-J. Gao, L. Zhang and A.-J. Wang, *Small*, 2023, **19**, 2300136, 10.1002/sml.202300136.
9. X. Sun, P. Wei, S. Gu, J. Zhang, Z. Jiang, J. Wan, Z. Chen, L. Huang, Y. Xu, C. Fang, Q. Li, J. Han and Y. Huang, *Small*, 2020, **16**, 1906057, 10.1002/sml.201906057.
10. L. Cui, Q. Zhang and X. He, *J. Electroanal. Chem.*, 2020, **871**, 114316, 10.1016/j.jelechem.2020.114316.
11. H. Wang, C. Sun, E. Zhu, C. Shi, J. Yu and M. Xu, *J. Alloys Compd.*, 2023, **948**, 169728, 10.1016/j.jallcom.2023.169728.
